# Supplementary material for: Scenario Analysis of the Impact on Drinking Water Intakes from Bromide in the Discharge of Treated Oil and Gas Wastewater
Source: Atypon-hosted journal article supplement (doi:10.1061/(asce)ee.1943-7870.0000968), 2015-08-13
Supplement: supplemental_data_ee.1943-7870.0000968_weaver.pdf [file supplemental_data_ee.1943-7870.0000968_weaver.pdf]

ASCE Journal of Environmental Engineering

**Scenario Analysis of the Impact on Drinking Water Intakes from Bromide in the Discharge of Treated Oil and Gas Wastewater**

James W. Weaver, Jie Xu, and Susan C. Mravik

DOI: 10.1061/(ASCE)EE.1943-7870.0000968

**Supplemental Data**

**Initial Mixing in the Allegheny River**

Initial mixing distances for the Allegheny River are given in Table S8 according to the method developed by Yotsukura and Cobb (1972), using the coefficients developed for differing injection points developed by Kilpatrick and Wilson (1989). When the injection is made at the edge, the initially skewed concentration distribution at the injection point requires greater distances than from Franklin to Kittaning (127 km) to achieve optimum lateral mixing. If the injection is made in the channel, either at the centerline or from multiple points, the optimum distance is reduced greatly.

**SUPPLEMENTAL DATA**

Table S1. Characteristics of the Monocacy River used in the semi-analytical model simulations.

| <i>Location</i> | <i>Distance from Downstream End</i> | <i>Annual Discharge</i>  | <i>Discharge</i>         | <i>Drainage Area</i>    | <i>Slope</i> | <i>Width</i> | <i>Average Depth</i> |
|-----------------|-------------------------------------|--------------------------|--------------------------|-------------------------|--------------|--------------|----------------------|
|                 | <i>(km)</i>                         | <i>(m<sup>3</sup>/s)</i> | <i>(m<sup>3</sup>/s)</i> | <i>(km<sup>2</sup>)</i> | <i>(m/m)</i> | <i>(m)</i>   | <i>(m)</i>           |
| Injection Point | 34.3                                | --                       | --                       | --                      | --           | --           | --                   |
| Section 1       | 24.0                                | 19.7                     | 14.3                     | 1586                    | 0.0006       | 37.2         | 0.8                  |
| Section 2       | 16.0                                | 20.5                     | 15.1                     | 1650                    | 0.0006       | 50.0         | 1.0                  |
| Section 3       | 7.5                                 | 22.6                     | 15.1                     | 1819                    | 0.0005       | 50.6         | 0.8                  |
| Section 4       | 0                                   | 26.2                     | 18.5                     | 2115                    | 0.0003       | 51.2         | 0.6                  |

**SUPPLEMENTAL DATA**

Table S2. Monocacy River tracer data and semi-analytical model results.

| <i>Result Type</i> | <i>Peak Arrival Time</i>              |          |          |          | <i>Peak Concentration</i>  |          |          |          |
|--------------------|---------------------------------------|----------|----------|----------|----------------------------|----------|----------|----------|
|                    | <i>(hr)</i>                           |          |          |          | <i>(mg/L)</i>              |          |          |          |
|                    | <i>Measurement Section</i>            |          |          |          | <i>Measurement Section</i> |          |          |          |
|                    | <i>1</i>                              | <i>2</i> | <i>3</i> | <i>4</i> | <i>1</i>                   | <i>2</i> | <i>3</i> | <i>4</i> |
| Tracer             | 7.2                                   | 13.6     | 19.6     | 25.8     | 0.1841                     | .01187   | .00901   | 0.00606  |
|                    | <i>% difference with tracer value</i> |          |          |          |                            |          |          |          |
| Semi-Analytical    | 3.3                                   | -0.8     | 0.9      | -1.1     | 19.9                       | 23.2     | 29.1     | 44.6     |

**SUPPLEMENTAL DATA**

Table S3. Steady-state simulation parameters for the creek and river scenarios. Effluent types are defined in Table 2 of main text.

| <i>Scenario</i> | <i>River Discharge</i> | <i>Effluent Type</i> | <i>Effluent Discharge</i> |
|-----------------|------------------------|----------------------|---------------------------|
| Creek           | Low Flow Month         | Produced-C           | Permitted Level           |
|                 |                        | Produced-ME          | Permitted Level           |
|                 |                        | Produced-ME          | 0.50 x Permitted Level    |
|                 |                        | Produced-ME          | 0.33 x Permitted Level    |
|                 |                        | Produced-ME          | 0.25 x Permitted Level    |
|                 |                        | Mixed/Flowback       | Permitted Level           |
|                 |                        | Lower Flowback       | Permitted Level           |
|                 |                        | Lower Bromide        | Permitted Level           |
|                 | High Flow Month        | Produced-C           | Permitted Level           |
|                 |                        | Produced-ME          | Permitted Level           |
|                 |                        | Produced-ME          | 0.50 x Permitted Level    |
|                 |                        | Produced-ME          | 0.33 x Permitted Level    |
|                 |                        | Produced-ME          | 0.25 x Permitted Level    |
|                 |                        | Mixed/Flowback       | Permitted Level           |
|                 |                        | Lower Flowback       | Permitted Level           |
|                 |                        | Lower Bromide        | Permitted Level           |
| River           | Low Flow Month         | Produced-C           | Permitted Level           |
|                 |                        | Produced-ME          | Permitted Level           |
|                 |                        | Produced-ME          | 0.50 x Permitted Level    |
|                 |                        | Produced-ME          | 0.33 x Permitted Level    |
|                 |                        | Produced-ME          | 0.25 x Permitted Level    |
|                 |                        | Mixed/Flowback       | Permitted Level           |
|                 |                        | Lower Flowback       | Permitted Level           |
|                 |                        | Lower Bromide        | Permitted Level           |
|                 | High Flow Month        | Produced-C           | Permitted Level           |
|                 |                        | Produced-ME          | Permitted Level           |
|                 |                        | Produced-ME          | 0.50 x Permitted Level    |
|                 |                        | Produced-ME          | 0.33 x Permitted Level    |
|                 |                        | Produced-ME          | 0.25 x Permitted Level    |
|                 |                        | Mixed/Flowback       | Permitted Level           |
|                 |                        | Lower Flowback       | Permitted Level           |
|                 |                        | Lower Bromide        | Permitted Level           |

**SUPPLEMENTAL DATA**

Table S4. Transient simulation parameters for produced water in the Allegheny River using effluents at the 5<sup>th</sup> and 95<sup>th</sup> percentiles of the bromide produced water frequency distribution. Effluent types are defined in Table 2 of main text.

| <i>Active discharge period</i>         | <i>River Flow</i> | <i>Effluent Concentration</i> | <i>Effluent Type</i>                            |
|----------------------------------------|-------------------|-------------------------------|-------------------------------------------------|
| 4-, 8-, 12-, and 24- hour; 5 days/week | Low Flow Month    | 95% Concentration Percentile  | Produced-ME<br>Mixed/Flowback<br>Lower Flowback |
|                                        |                   | 5% Concentration Percentile   | Produced-ME<br>Mixed/Flowback<br>Lower Flowback |
|                                        | High Flow Month   | 95% Concentration Percentile  | Produced-ME<br>Mixed/Flowback<br>Lower Flowback |
|                                        |                   | 5% Concentration Percentile   | Produced-ME<br>Mixed/Flowback<br>Lower Flowback |

**SUPPLEMENTAL DATA**

Table S5. Effluent characteristics for transient release scenarios.

| <i>Release Duration<br/>(hour)</i> | <i>Effluent Discharge<br/>(MGD)</i> | <i>Effluent Type</i> | <i>Released Mass<br/>(Kg)</i> |                        |
|------------------------------------|-------------------------------------|----------------------|-------------------------------|------------------------|
|                                    |                                     |                      | <i>5<sup>th</sup></i>         | <i>95<sup>th</sup></i> |
| 4                                  | 0.3                                 | Produced-ME          | 220                           | 601                    |
|                                    |                                     | Mixed/Flowback       | 68.9                          | 189                    |
|                                    |                                     | Lower Flowback       | 12.9                          | 57.4                   |
| 8                                  | 0.3                                 | Produced-ME          | 441                           | 1200                   |
|                                    |                                     | Mixed/Flowback       | 138                           | 379                    |
|                                    |                                     | Lower Flowback       | 25.7                          | 115                    |
| 12                                 | 0.3                                 | Produced-ME          | 661                           | 1800                   |
|                                    |                                     | Mixed/Flowback       | 207                           | 568                    |
|                                    |                                     | Lower Flowback       | 38.6                          | 172                    |
| 24                                 | 0.3                                 | Produced-ME          | 1320                          | 3600                   |
|                                    |                                     | Mixed/Flowback       | 413                           | 1140                   |
|                                    |                                     | Lower Flowback       | 77                            | 344                    |

**SUPPLEMENTAL DATA**

Table S6. Average bromide concentrations and bromide concentration reduction factors for continuous (24 hour) and pulse releases of Produced-ME water at downstream gaged locations in the Allegheny River.

| <b>Pulse Duration<br/>(hrs per work day)</b> | <b>Average Bromide Concentration at Downstream Location</b>        |                                 |                                      | <b>Average Bromide Concentration Reduction Factor<sup>(a)</sup></b> |                                 |                                      |
|----------------------------------------------|--------------------------------------------------------------------|---------------------------------|--------------------------------------|---------------------------------------------------------------------|---------------------------------|--------------------------------------|
|                                              | <b>Parker, PA<br/>65.98 (km)</b>                                   | <b>Rimer, PA<br/>103.4 (km)</b> | <b>Kittanning, PA<br/>126.5 (km)</b> | <b>Parker, PA<br/>65.98 (km)</b>                                    | <b>Rimer, PA<br/>103.4 (km)</b> | <b>Kittanning, PA<br/>126.5 (km)</b> |
|                                              |                                                                    |                                 |                                      |                                                                     |                                 |                                      |
|                                              | <b>Low Flow, 95<sup>TH</sup> percentile release concentration</b>  |                                 |                                      |                                                                     |                                 |                                      |
| 24                                           | 3.18x10 <sup>-1</sup>                                              | 2.74x10 <sup>-1</sup>           | 2.43x10 <sup>-1</sup>                | 1.00                                                                | 1.00                            | 1.00                                 |
| 12                                           | 1.71x10 <sup>-1</sup>                                              | 1.47x10 <sup>-1</sup>           | 1.30x10 <sup>-1</sup>                | 0.54                                                                | 0.54                            | 0.54                                 |
| 8                                            | 1.16x10 <sup>-1</sup>                                              | 1.01x10 <sup>-1</sup>           | 8.97x10 <sup>-2</sup>                | 0.36                                                                | 0.37                            | 0.37                                 |
| 4                                            | 5.82x10 <sup>-2</sup>                                              | 5.09x10 <sup>-2</sup>           | 4.60x10 <sup>-2</sup>                | 0.18                                                                | 0.19                            | 0.19                                 |
|                                              | <b>High Flow, 95<sup>TH</sup> percentile release concentration</b> |                                 |                                      |                                                                     |                                 |                                      |
| 24                                           | 5.19x10 <sup>-2</sup>                                              | 3.65x10 <sup>-2</sup>           | 3.13x10 <sup>-2</sup>                | 1.00                                                                | 1.00                            | 1.00                                 |
| 12                                           | 2.68x10 <sup>-2</sup>                                              | 2.06x10 <sup>-2</sup>           | 1.69x10 <sup>-2</sup>                | 0.52                                                                | 0.56                            | 0.54                                 |
| 8                                            | 1.76x10 <sup>-2</sup>                                              | 1.51x10 <sup>-2</sup>           | 1.16x10 <sup>-2</sup>                | 0.34                                                                | 0.41                            | 0.37                                 |
| 4                                            | 8.64x10 <sup>-3</sup>                                              | 8.70x10 <sup>-3</sup>           | 6.10x10 <sup>-3</sup>                | 0.17                                                                | 0.24                            | 0.19                                 |
|                                              | <b>Low Flow, 5<sup>TH</sup> percentile release concentration</b>   |                                 |                                      |                                                                     |                                 |                                      |
| 24                                           | 1.17x10 <sup>-1</sup>                                              | 1.00x10 <sup>-1</sup>           | 8.94x10 <sup>-2</sup>                | 1.00                                                                | 1.00                            | 1.00                                 |
| 12                                           | 6.30x10 <sup>-2</sup>                                              | 5.42x10 <sup>-2</sup>           | 4.84x10 <sup>-2</sup>                | 0.54                                                                | 0.54                            | 0.54                                 |
| 8                                            | 4.23x10 <sup>-2</sup>                                              | 3.68x10 <sup>-2</sup>           | 3.29x10 <sup>-2</sup>                | 0.36                                                                | 0.37                            | 0.37                                 |
| 4                                            | 2.14x10 <sup>-2</sup>                                              | 1.87x10 <sup>-2</sup>           | 1.70x10 <sup>-2</sup>                | 0.18                                                                | 0.19                            | 0.19                                 |
|                                              | <b>High Flow, 5<sup>TH</sup> percentile release concentration</b>  |                                 |                                      |                                                                     |                                 |                                      |
| 24                                           | 1.90x10 <sup>-2</sup>                                              | 1.35x10 <sup>-2</sup>           | 1.16x10 <sup>-2</sup>                | 1.00                                                                | 1.00                            | 1.00                                 |
| 12                                           | 9.82x10 <sup>-3</sup>                                              | 7.56x10 <sup>-3</sup>           | 6.26x10 <sup>-3</sup>                | 0.52                                                                | 0.56                            | 0.54                                 |
| 8                                            | 6.45x10 <sup>-3</sup>                                              | 5.54x10 <sup>-3</sup>           | 4.30x10 <sup>-3</sup>                | 0.34                                                                | 0.41                            | 0.37                                 |
| 4                                            | 3.15x10 <sup>-3</sup>                                              | 3.20x10 <sup>-3</sup>           | 2.22x10 <sup>-3</sup>                | 0.17                                                                | 0.24                            | 0.19                                 |

<sup>(a)</sup>The Average Bromide Concentration Reduction factor is the ratio of the average bromide concentration in the reduced pulse-duration to that of average bromide concentration in the 24-hour simulation.

**SUPPLEMENTAL DATA**

Table S7. Discharge, average parameters and the estimated lateral mixing coefficient and initial mixing distance from the method developed by Yotsukura and Cobb (1972) and Kilpatrick and Wilson (1989). The transverse mixing coefficient is estimated in units of ft<sup>2</sup>/s from  $K_z = 1.13 d^{1.5} s^{0.5}$  where d is the average depth in feet and s is the slope of the water surface, which is approximated by the channel bed slope in the table.

| Date                  | Discharge<br>(m <sup>3</sup> /s) | Mean<br>velocity<br>(m/s) | Width<br>(m) | Mean<br>depth<br>(m) | Slope<br>(m/m) | Transverse<br>mixing<br>coefficient<br>(m <sup>2</sup> /s) | Initial mixing distance (km)                                                    |                         |                    |                      |
|-----------------------|----------------------------------|---------------------------|--------------|----------------------|----------------|------------------------------------------------------------|---------------------------------------------------------------------------------|-------------------------|--------------------|----------------------|
|                       |                                  |                           |              |                      |                |                                                            | Injection point location and coefficient K<br>from Kilpatrick and Wilson (1989) |                         |                    |                      |
|                       |                                  |                           |              |                      |                |                                                            | x10d<br>ge<br>(0.4)                                                             | Center<br>line<br>(0.1) | Two (a)<br>(0.025) | Three (b)<br>(0.011) |
| <b>Franklin, PA</b>   |                                  |                           |              |                      |                |                                                            |                                                                                 |                         |                    |                      |
| 8/13/2013             | 80.1                             | 0.406                     | 206          | 0.963                | 0.000566       | 0.014                                                      | 490                                                                             | 120                     | 31                 | 13                   |
| 6/10/2014             | 286                              | 0.792                     | 168          | 2.16                 | 0.000566       | 0.047                                                      | 190                                                                             | 47                      | 12                 | 5                    |
| 4/18/2013             | 725                              | 1.37                      | 184          | 2.86                 | 0.000566       | 0.072                                                      | 260                                                                             | 65                      | 16                 | 7                    |
| 3/15/2011             | 1540                             | 1.71                      | 239          | 3.75                 | 0.000566       | 0.11                                                       | 360                                                                             | 91                      | 23                 | 10                   |
| <b>Parker, PA</b>     |                                  |                           |              |                      |                |                                                            |                                                                                 |                         |                    |                      |
| 7/16/2012             | 90.3                             | 0.418                     | 230          | 0.936                | 0.000511       | 0.013                                                      | 690                                                                             | 170                     | 43                 | 19                   |
| 10/21/2014            | 294                              | 0.954                     | 238          | 1.3                  | 0.000511       | 0.021                                                      | 1030                                                                            | 260                     | 65                 | 28                   |
| 5/5/2011              | 946                              | 1.45                      | 256          | 2.55                 | 0.000511       | 0.057                                                      | 660                                                                             | 170                     | 41                 | 18                   |
| <b>Kittanning, PA</b> |                                  |                           |              |                      |                |                                                            |                                                                                 |                         |                    |                      |
| 8/9/2012              | 107                              | 0.144                     | 251          | 2.94                 | 0.000767       | 0.087                                                      | 42                                                                              | 10                      | 3                  | 1                    |
| 5/21/2014             | 1130                             | 0.99                      | 258          | 4.43                 | 0.000767       | 0.16                                                       | 160                                                                             | 40                      | 10                 | 5                    |
| 3/11/2011             | 3270                             | 1.74                      | 284          | 6.63                 | 0.000767       | 0.3                                                        | 190                                                                             | 47                      | 12                 | 5                    |

- (a) The injection is made at the center of each half of flow  
(b) The injection is made at the center of each third of flow



**SUPPLEMENTAL DATA**

Table S8. Summary of peak concentration, average concentration and peak-to-average concentration ratios at Kittanning for the 5-day sequence of pulse releases of the 95<sup>th</sup>-percentile Produced-ME water effluent discharge in the Allegheny River.

| <i>Duration</i>                                              | <i>Minimum</i>        | <i>Percentiles</i>    |                        |                        |                        |                        | <i>Maximum</i>        |
|--------------------------------------------------------------|-----------------------|-----------------------|------------------------|------------------------|------------------------|------------------------|-----------------------|
|                                                              |                       | <i>5<sup>th</sup></i> | <i>25<sup>th</sup></i> | <i>50<sup>th</sup></i> | <i>75<sup>th</sup></i> | <i>95<sup>th</sup></i> |                       |
| <b><i>Peak Concentration (mg/L) Low Flow</i></b>             |                       |                       |                        |                        |                        |                        |                       |
| 4 hr                                                         | 7.72x10 <sup>-3</sup> | 3.35x10 <sup>-2</sup> | 6.54x10 <sup>-2</sup>  | 1.02x10 <sup>-1</sup>  | 1.49x10 <sup>-1</sup>  | 2.40x10 <sup>-1</sup>  | 5.39x10 <sup>-1</sup> |
| 8 hr                                                         | 1.42x10 <sup>-2</sup> | 5.25x10 <sup>-2</sup> | 1.15x10 <sup>-1</sup>  | 1.78x10 <sup>-1</sup>  | 2.60x10 <sup>-1</sup>  | 4.12x10 <sup>-1</sup>  | 8.14x10 <sup>-1</sup> |
| 12 hr                                                        | 1.03x10 <sup>-2</sup> | 6.18x10 <sup>-2</sup> | 1.57x10 <sup>-1</sup>  | 2.35x10 <sup>-1</sup>  | 3.32x10 <sup>-1</sup>  | 5.48x10 <sup>-1</sup>  | 9.11x10 <sup>-1</sup> |
| <b><i>Average Concentration (mg/L), Low Flow</i></b>         |                       |                       |                        |                        |                        |                        |                       |
| 4 hr                                                         | 1.86x10 <sup>-3</sup> | 1.12x10 <sup>-2</sup> | 3.13x10 <sup>-2</sup>  | 4.60x10 <sup>-2</sup>  | 6.48x10 <sup>-2</sup>  | 1.15x10 <sup>-1</sup>  | 1.55x10 <sup>-1</sup> |
| 8 hr                                                         | 5.56x10 <sup>-3</sup> | 2.14x10 <sup>-2</sup> | 6.07x10 <sup>-2</sup>  | 8.97x10 <sup>-2</sup>  | 1.26x10 <sup>-1</sup>  | 2.23x10 <sup>-1</sup>  | 3.12x10 <sup>-1</sup> |
| 12 hr                                                        | 5.65x10 <sup>-3</sup> | 3.15x10 <sup>-2</sup> | 8.87x10 <sup>-2</sup>  | 1.30x10 <sup>-1</sup>  | 1.85x10 <sup>-1</sup>  | 3.23x10 <sup>-1</sup>  | 4.42x10 <sup>-1</sup> |
| <b><i>Peak to Average Concentration Ratio, Low Flow</i></b>  |                       |                       |                        |                        |                        |                        |                       |
| 4 hr                                                         | 4.15                  | 3.00                  | 2.09                   | 2.21                   | 2.29                   | 2.09                   | 3.47                  |
| 8 hr                                                         | 2.55                  | 2.45                  | 1.89                   | 1.98                   | 2.06                   | 1.85                   | 2.61                  |
| 12 hr                                                        | 1.82                  | 1.96                  | 1.77                   | 1.80                   | 1.80                   | 1.70                   | 2.06                  |
| <b><i>Peak Concentration (mg/L) High Flow</i></b>            |                       |                       |                        |                        |                        |                        |                       |
| 4 hr                                                         | 1.40x10 <sup>-5</sup> | 7.58x10 <sup>-3</sup> | 1.43x10 <sup>-2</sup>  | 1.95x10 <sup>-2</sup>  | 2.68x10 <sup>-2</sup>  | 3.76x10 <sup>-2</sup>  | 8.53x10 <sup>-2</sup> |
| 8 hr                                                         | 4.32x10 <sup>-5</sup> | 8.85x10 <sup>-3</sup> | 2.05x10 <sup>-2</sup>  | 2.89x10 <sup>-2</sup>  | 3.97x10 <sup>-2</sup>  | 5.74x10 <sup>-2</sup>  | 1.22x10 <sup>-1</sup> |
| 12 hr                                                        | 6.44x10 <sup>-6</sup> | 9.39x10 <sup>-3</sup> | 2.22x10 <sup>-2</sup>  | 3.31x10 <sup>-2</sup>  | 4.56x10 <sup>-2</sup>  | 6.72x10 <sup>-2</sup>  | 1.41x10 <sup>-1</sup> |
| <b><i>Average Concentration (mg/L), High Flow</i></b>        |                       |                       |                        |                        |                        |                        |                       |
| 4 hr                                                         | 3.74x10 <sup>-6</sup> | 1.90x10 <sup>-3</sup> | 4.22x10 <sup>-3</sup>  | 6.10x10 <sup>-3</sup>  | 8.79x10 <sup>-3</sup>  | 1.25x10 <sup>-2</sup>  | 2.47x10 <sup>-2</sup> |
| 8 hr                                                         | 1.75x10 <sup>-5</sup> | 3.36x10 <sup>-3</sup> | 8.02x10 <sup>-3</sup>  | 1.16x10 <sup>-2</sup>  | 1.66x10 <sup>-2</sup>  | 2.33x10 <sup>-2</sup>  | 4.92x10 <sup>-2</sup> |
| 12 hr                                                        | 4.30x10 <sup>-6</sup> | 5.01x10 <sup>-3</sup> | 1.15x10 <sup>-2</sup>  | 1.69x10 <sup>-2</sup>  | 2.41x10 <sup>-2</sup>  | 3.33x10 <sup>-2</sup>  | 7.08x10 <sup>-2</sup> |
| <b><i>Peak to Average Concentration Ratio, High Flow</i></b> |                       |                       |                        |                        |                        |                        |                       |
| 4 hr                                                         | 3.74                  | 3.99                  | 3.39                   | 3.20                   | 3.05                   | 3.00                   | 3.46                  |
| 8 hr                                                         | 2.46                  | 2.63                  | 2.56                   | 2.49                   | 2.40                   | 2.46                   | 2.47                  |
| 12 hr                                                        | 1.50                  | 1.87                  | 1.93                   | 1.95                   | 1.89                   | 2.02                   | 2.00                  |

**SUPPLEMENTAL DATA**

Table S9. Summary of peak concentration, average concentration and peak-to-average concentration ratios at Kittanning for the 5-day sequence of pulse releases of the 5<sup>th</sup>-percentile Produced-ME water effluent discharge in the Allegheny River.

| <i>Duration</i>                                       | <i>Minimum</i>        | <i>Percentiles</i>    |                        |                        |                        |                        | <i>Maximum</i>        |
|-------------------------------------------------------|-----------------------|-----------------------|------------------------|------------------------|------------------------|------------------------|-----------------------|
|                                                       |                       | <i>5<sup>th</sup></i> | <i>25<sup>th</sup></i> | <i>50<sup>th</sup></i> | <i>75<sup>th</sup></i> | <i>95<sup>th</sup></i> |                       |
| <b>Peak Concentration (mg/L) Low Flow</b>             |                       |                       |                        |                        |                        |                        |                       |
| 4hr                                                   | 4.69x10 <sup>-3</sup> | 1.21x10 <sup>-2</sup> | 2.40x10 <sup>-2</sup>  | 3.73x10 <sup>-2</sup>  | 5.43x10 <sup>-2</sup>  | 8.89x10 <sup>-2</sup>  | 1.98x10 <sup>-1</sup> |
| 8hr                                                   | 5.73x10 <sup>-3</sup> | 1.95x10 <sup>-2</sup> | 4.25x10 <sup>-2</sup>  | 6.51x10 <sup>-2</sup>  | 9.53x10 <sup>-2</sup>  | 1.52x10 <sup>-1</sup>  | 3.05x10 <sup>-1</sup> |
| 12 hr                                                 | 3.77x10 <sup>-3</sup> | 2.25x10 <sup>-2</sup> | 5.76x10 <sup>-2</sup>  | 8.65x10 <sup>-2</sup>  | 1.22x10 <sup>-1</sup>  | 1.99x10 <sup>-1</sup>  | 3.47x10 <sup>-1</sup> |
| <b>Average Concentration (mg/L), Low Flow</b>         |                       |                       |                        |                        |                        |                        |                       |
| 4hr                                                   | 1.29x10 <sup>-3</sup> | 4.07x10 <sup>-3</sup> | 1.15x10 <sup>-2</sup>  | 1.70x10 <sup>-2</sup>  | 2.40x10 <sup>-2</sup>  | 4.21x10 <sup>-2</sup>  | 6.45x10 <sup>-2</sup> |
| 8hr                                                   | 2.25x10 <sup>-3</sup> | 7.93x10 <sup>-3</sup> | 2.25x10 <sup>-2</sup>  | 3.29x10 <sup>-2</sup>  | 4.66x10 <sup>-2</sup>  | 8.22x10 <sup>-2</sup>  | 1.16x10 <sup>-1</sup> |
| 12 hr                                                 | 2.07x10 <sup>-3</sup> | 1.15x10 <sup>-2</sup> | 3.26x10 <sup>-2</sup>  | 4.84x10 <sup>-2</sup>  | 6.81x10 <sup>-2</sup>  | 1.18x10 <sup>-1</sup>  | 1.69x10 <sup>-1</sup> |
| <b>Peak to Average Concentration (mg/L) High Flow</b> |                       |                       |                        |                        |                        |                        |                       |
| 4hr                                                   | 3.65                  | 2.98                  | 2.10                   | 2.20                   | 2.27                   | 2.11                   | 3.07                  |
| 8hr                                                   | 2.55                  | 2.46                  | 1.88                   | 1.98                   | 2.05                   | 1.85                   | 2.63                  |
| 12 hr                                                 | 1.82                  | 1.96                  | 1.77                   | 1.79                   | 1.79                   | 1.68                   | 2.06                  |
| <b>Peak Concentration (mg/L) High Flow</b>            |                       |                       |                        |                        |                        |                        |                       |
| 4hr                                                   | 4.20x10 <sup>-5</sup> | 2.83x10 <sup>-3</sup> | 5.18x10 <sup>-3</sup>  | 7.12x10 <sup>-3</sup>  | 9.82x10 <sup>-3</sup>  | 1.36x10 <sup>-2</sup>  | 3.24x10 <sup>-2</sup> |
| 8hr                                                   | 1.19x10 <sup>-5</sup> | 3.40x10 <sup>-3</sup> | 7.53x10 <sup>-3</sup>  | 1.07x10 <sup>-2</sup>  | 1.47x10 <sup>-2</sup>  | 2.11x10 <sup>-2</sup>  | 4.68x10 <sup>-2</sup> |
| 12 hr                                                 | 3.43x10 <sup>-5</sup> | 3.31x10 <sup>-3</sup> | 8.13x10 <sup>-3</sup>  | 1.22x10 <sup>-2</sup>  | 1.67x10 <sup>-2</sup>  | 2.46x10 <sup>-2</sup>  | 5.27x10 <sup>-2</sup> |
| <b>Average Concentration (mg/L), High Flow</b>        |                       |                       |                        |                        |                        |                        |                       |
| 4hr                                                   | 1.12x10 <sup>-5</sup> | 7.00x10 <sup>-4</sup> | 1.54x10 <sup>-3</sup>  | 2.22x10 <sup>-3</sup>  | 3.23x10 <sup>-3</sup>  | 4.57x10 <sup>-3</sup>  | 9.32x10 <sup>-3</sup> |
| 8hr                                                   | 5.60x10 <sup>-6</sup> | 1.29x10 <sup>-3</sup> | 2.93x10 <sup>-3</sup>  | 4.30x10 <sup>-3</sup>  | 6.09x10 <sup>-3</sup>  | 8.55x10 <sup>-3</sup>  | 1.87x10 <sup>-2</sup> |
| 12 hr                                                 | 1.95x10 <sup>-5</sup> | 1.76x10 <sup>-3</sup> | 4.23x10 <sup>-3</sup>  | 6.26x10 <sup>-3</sup>  | 8.78x10 <sup>-3</sup>  | 1.23x10 <sup>-2</sup>  | 2.62x10 <sup>-2</sup> |
| <b>Peak to Average Concentration Ratio, High Flow</b> |                       |                       |                        |                        |                        |                        |                       |
| 4hr                                                   | 3.73                  | 4.04                  | 3.36                   | 3.20                   | 3.04                   | 2.98                   | 3.47                  |
| 8hr                                                   | 2.13                  | 2.64                  | 2.57                   | 2.49                   | 2.41                   | 2.47                   | 2.50                  |
| 12 hr                                                 | 1.76                  | 1.88                  | 1.92                   | 1.96                   | 1.90                   | 2.01                   | 2.01                  |

**SUPPLEMENTAL DATA**

Table S10. Summary of peak concentration, average concentration and peak-to-average concentration ratios at Kittanning for the 5-day sequence of pulse releases of the 95<sup>th</sup>-percentile Lower Flowback effluent discharge in the Allegheny River.

| <i>Duration</i>                                       | <i>Minimum</i>        | <i>Percentiles</i>    |                        |                        |                        |                        | <i>Maximum</i>        |
|-------------------------------------------------------|-----------------------|-----------------------|------------------------|------------------------|------------------------|------------------------|-----------------------|
|                                                       |                       | <i>5<sup>th</sup></i> | <i>25<sup>th</sup></i> | <i>50<sup>th</sup></i> | <i>75<sup>th</sup></i> | <i>95<sup>th</sup></i> |                       |
| <b>Peak Concentration (mg/L) Low Flow</b>             |                       |                       |                        |                        |                        |                        |                       |
| 4 hr                                                  | 1.23x10 <sup>-3</sup> | 3.17x10 <sup>-3</sup> | 6.28x10 <sup>-3</sup>  | 9.67x10 <sup>-3</sup>  | 1.42x10 <sup>-2</sup>  | 2.30x10 <sup>-2</sup>  | 5.15x10 <sup>-2</sup> |
| 8 hr                                                  | 8.61x10 <sup>-4</sup> | 5.05x10 <sup>-3</sup> | 1.10x10 <sup>-2</sup>  | 1.70x10 <sup>-2</sup>  | 2.49x10 <sup>-2</sup>  | 3.93x10 <sup>-2</sup>  | 7.98x10 <sup>-2</sup> |
| 12 hr                                                 | 1.32x10 <sup>-3</sup> | 5.93x10 <sup>-3</sup> | 1.50x10 <sup>-2</sup>  | 2.26x10 <sup>-2</sup>  | 3.17x10 <sup>-2</sup>  | 5.22x10 <sup>-2</sup>  | 8.69x10 <sup>-2</sup> |
| <b>Average Concentration (mg/L), Low Flow</b>         |                       |                       |                        |                        |                        |                        |                       |
| 4 hr                                                  | 3.06x10 <sup>-4</sup> | 1.06x10 <sup>-3</sup> | 3.03x10 <sup>-3</sup>  | 4.45x10 <sup>-3</sup>  | 6.28x10 <sup>-3</sup>  | 1.11x10 <sup>-2</sup>  | 1.51x10 <sup>-2</sup> |
| 8 hr                                                  | 3.38x10 <sup>-4</sup> | 2.09x10 <sup>-3</sup> | 5.90x10 <sup>-3</sup>  | 8.65x10 <sup>-3</sup>  | 1.22x10 <sup>-2</sup>  | 2.14x10 <sup>-2</sup>  | 3.08x10 <sup>-2</sup> |
| 12 hr                                                 | 7.26x10 <sup>-4</sup> | 3.02x10 <sup>-3</sup> | 8.57x10 <sup>-3</sup>  | 1.27x10 <sup>-2</sup>  | 1.77x10 <sup>-2</sup>  | 3.11x10 <sup>-2</sup>  | 4.26x10 <sup>-2</sup> |
| <b>Peak to Average Concentration (mg/L) High Flow</b> |                       |                       |                        |                        |                        |                        |                       |
| 4 hr                                                  | 4.04                  | 2.99                  | 2.08                   | 2.17                   | 2.26                   | 2.07                   | 3.40                  |
| 8 hr                                                  | 2.55                  | 2.41                  | 1.86                   | 1.96                   | 2.04                   | 1.84                   | 2.60                  |
| 12 hr                                                 | 1.82                  | 1.97                  | 1.75                   | 1.78                   | 1.80                   | 1.68                   | 2.04                  |
| <b>Peak Concentration (mg/L) High Flow</b>            |                       |                       |                        |                        |                        |                        |                       |
| 4 hr                                                  | 1.39x10 <sup>-6</sup> | 7.32x10 <sup>-4</sup> | 1.35x10 <sup>-3</sup>  | 1.87x10 <sup>-3</sup>  | 2.57x10 <sup>-3</sup>  | 3.55x10 <sup>-3</sup>  | 8.42x10 <sup>-3</sup> |
| 8 hr                                                  | 5.61x10 <sup>-6</sup> | 8.68x10 <sup>-4</sup> | 1.97x10 <sup>-3</sup>  | 2.79x10 <sup>-3</sup>  | 3.81x10 <sup>-3</sup>  | 5.54x10 <sup>-3</sup>  | 1.18x10 <sup>-2</sup> |
| 12 hr                                                 | 6.59x10 <sup>-6</sup> | 8.37x10 <sup>-4</sup> | 2.12x10 <sup>-3</sup>  | 3.18x10 <sup>-3</sup>  | 4.37x10 <sup>-3</sup>  | 6.42x10 <sup>-3</sup>  | 1.32x10 <sup>-2</sup> |
| <b>Average Concentration (mg/L), High Flow</b>        |                       |                       |                        |                        |                        |                        |                       |
| 4 hr                                                  | 1.24x10 <sup>-6</sup> | 1.84x10 <sup>-4</sup> | 4.02x10 <sup>-4</sup>  | 5.85x10 <sup>-4</sup>  | 8.41x10 <sup>-4</sup>  | 1.19x10 <sup>-3</sup>  | 2.43x10 <sup>-3</sup> |
| 8 hr                                                  | 3.20x10 <sup>-6</sup> | 3.27x10 <sup>-4</sup> | 7.67x10 <sup>-4</sup>  | 1.13x10 <sup>-3</sup>  | 1.60x10 <sup>-3</sup>  | 2.26x10 <sup>-3</sup>  | 4.69x10 <sup>-3</sup> |
| 12 hr                                                 | 4.40x10 <sup>-6</sup> | 4.48x10 <sup>-4</sup> | 1.10x10 <sup>-3</sup>  | 1.64x10 <sup>-3</sup>  | 2.30x10 <sup>-3</sup>  | 3.24x10 <sup>-3</sup>  | 6.71x10 <sup>-3</sup> |
| <b>Peak to Average Concentration Ratio, High Flow</b> |                       |                       |                        |                        |                        |                        |                       |
| 4 hr                                                  | 1.12                  | 3.97                  | 3.36                   | 3.20                   | 3.06                   | 2.98                   | 3.46                  |
| 8 hr                                                  | 1.75                  | 2.66                  | 2.57                   | 2.47                   | 2.38                   | 2.45                   | 2.51                  |
| 12 hr                                                 | 1.50                  | 1.87                  | 1.91                   | 1.94                   | 1.90                   | 1.98                   | 1.96                  |

**SUPPLEMENTAL DATA**

Table S11. Summary of peak concentration, average concentration and peak-to-average concentration ratios at Kittanning for the 5-day sequence of pulse releases of the 5<sup>th</sup>-percentile Lower Flowback effluent discharge in the Allegheny River.

| Duration                                              | Minimum               | Percentiles           |                       |                       |                       |                       | Maximum               |
|-------------------------------------------------------|-----------------------|-----------------------|-----------------------|-----------------------|-----------------------|-----------------------|-----------------------|
|                                                       |                       | 5 <sup>th</sup>       | 25 <sup>th</sup>      | 50 <sup>th</sup>      | 75 <sup>th</sup>      | 95 <sup>th</sup>      |                       |
| <b>Peak Concentration (mg/L) Low Flow</b>             |                       |                       |                       |                       |                       |                       |                       |
| 4 hr                                                  | 2.70x10 <sup>-4</sup> | 7.10x10 <sup>-4</sup> | 1.41x10 <sup>-3</sup> | 2.19x10 <sup>-3</sup> | 3.21x10 <sup>-3</sup> | 5.15x10 <sup>-3</sup> | 1.08x10 <sup>-2</sup> |
| 8 hr                                                  | 2.78x10 <sup>-4</sup> | 1.12x10 <sup>-3</sup> | 2.50x10 <sup>-3</sup> | 3.79x10 <sup>-3</sup> | 5.51x10 <sup>-3</sup> | 8.92x10 <sup>-3</sup> | 1.79x10 <sup>-2</sup> |
| 12 hr                                                 | 4.39x10 <sup>-4</sup> | 1.32x10 <sup>-3</sup> | 3.33x10 <sup>-3</sup> | 5.03x10 <sup>-3</sup> | 7.10x10 <sup>-3</sup> | 1.19x10 <sup>-2</sup> | 1.98x10 <sup>-2</sup> |
| <b>Average Concentration (mg/L), Low Flow</b>         |                       |                       |                       |                       |                       |                       |                       |
| 4 hr                                                  | 6.75x10 <sup>-5</sup> | 2.42x10 <sup>-4</sup> | 6.91x10 <sup>-4</sup> | 1.01x10 <sup>-3</sup> | 1.42x10 <sup>-3</sup> | 2.50x10 <sup>-3</sup> | 3.38x10 <sup>-3</sup> |
| 8 hr                                                  | 1.09x10 <sup>-4</sup> | 4.66x10 <sup>-4</sup> | 1.34x10 <sup>-3</sup> | 1.96x10 <sup>-3</sup> | 2.76x10 <sup>-3</sup> | 4.87x10 <sup>-3</sup> | 6.85x10 <sup>-3</sup> |
| 12 hr                                                 | 2.41x10 <sup>-4</sup> | 6.81x10 <sup>-4</sup> | 1.93x10 <sup>-3</sup> | 2.86x10 <sup>-3</sup> | 4.02x10 <sup>-3</sup> | 7.08x10 <sup>-3</sup> | 9.77x10 <sup>-3</sup> |
| <b>Peak to Average Concentration (mg/L) High Flow</b> |                       |                       |                       |                       |                       |                       |                       |
| 4 hr                                                  | 4.00                  | 2.93                  | 2.03                  | 2.18                  | 2.27                  | 2.06                  | 3.19                  |
| 8 hr                                                  | 2.54                  | 2.40                  | 1.87                  | 1.94                  | 2.00                  | 1.83                  | 2.61                  |
| 12 hr                                                 | 1.82                  | 1.94                  | 1.72                  | 1.76                  | 1.77                  | 1.68                  | 2.03                  |
| <b>Peak Concentration (mg/L) High Flow</b>            |                       |                       |                       |                       |                       |                       |                       |
| 4 hr                                                  | 2.86x10 <sup>-6</sup> | 1.66x10 <sup>-4</sup> | 3.03x10 <sup>-4</sup> | 4.22x10 <sup>-4</sup> | 5.81x10 <sup>-4</sup> | 8.10x10 <sup>-4</sup> | 1.86x10 <sup>-3</sup> |
| 8 hr                                                  | 3.56x10 <sup>-6</sup> | 1.93x10 <sup>-4</sup> | 4.39x10 <sup>-4</sup> | 6.25x10 <sup>-4</sup> | 8.50x10 <sup>-4</sup> | 1.22x10 <sup>-3</sup> | 2.80x10 <sup>-3</sup> |
| 12 hr                                                 | 1.03x10 <sup>-6</sup> | 1.92x10 <sup>-4</sup> | 4.76x10 <sup>-4</sup> | 7.13x10 <sup>-4</sup> | 9.75x10 <sup>-4</sup> | 1.44x10 <sup>-3</sup> | 3.02x10 <sup>-3</sup> |
| <b>Average Concentration (mg/L), High Flow</b>        |                       |                       |                       |                       |                       |                       |                       |
| 4 hr                                                  | 1.49x10 <sup>-6</sup> | 4.22x10 <sup>-5</sup> | 9.13x10 <sup>-5</sup> | 1.33x10 <sup>-4</sup> | 1.93x10 <sup>-4</sup> | 2.69x10 <sup>-4</sup> | 5.42x10 <sup>-4</sup> |
| 8 hr                                                  | 1.97x10 <sup>-6</sup> | 7.36x10 <sup>-5</sup> | 1.72x10 <sup>-4</sup> | 2.55x10 <sup>-4</sup> | 3.65x10 <sup>-4</sup> | 5.11x10 <sup>-4</sup> | 1.07x10 <sup>-3</sup> |
| 12 hr                                                 | 1.03x10 <sup>-6</sup> | 4.94x10 <sup>-5</sup> | 1.26x10 <sup>-4</sup> | 2.00x10 <sup>-4</sup> | 3.08x10 <sup>-4</sup> | 4.40x10 <sup>-4</sup> | 8.96x10 <sup>-4</sup> |
| <b>Peak to Average Concentration Ratio, High Flow</b> |                       |                       |                       |                       |                       |                       |                       |
| 4 hr                                                  | 1.92                  | 3.93                  | 3.32                  | 3.17                  | 3.01                  | 3.01                  | 3.44                  |
| 8 hr                                                  | 1.80                  | 2.62                  | 2.55                  | 2.45                  | 2.33                  | 2.40                  | 2.61                  |
| 12 hr                                                 | 1.00                  | 3.89                  | 3.78                  | 3.57                  | 3.16                  | 3.28                  | 3.37                  |

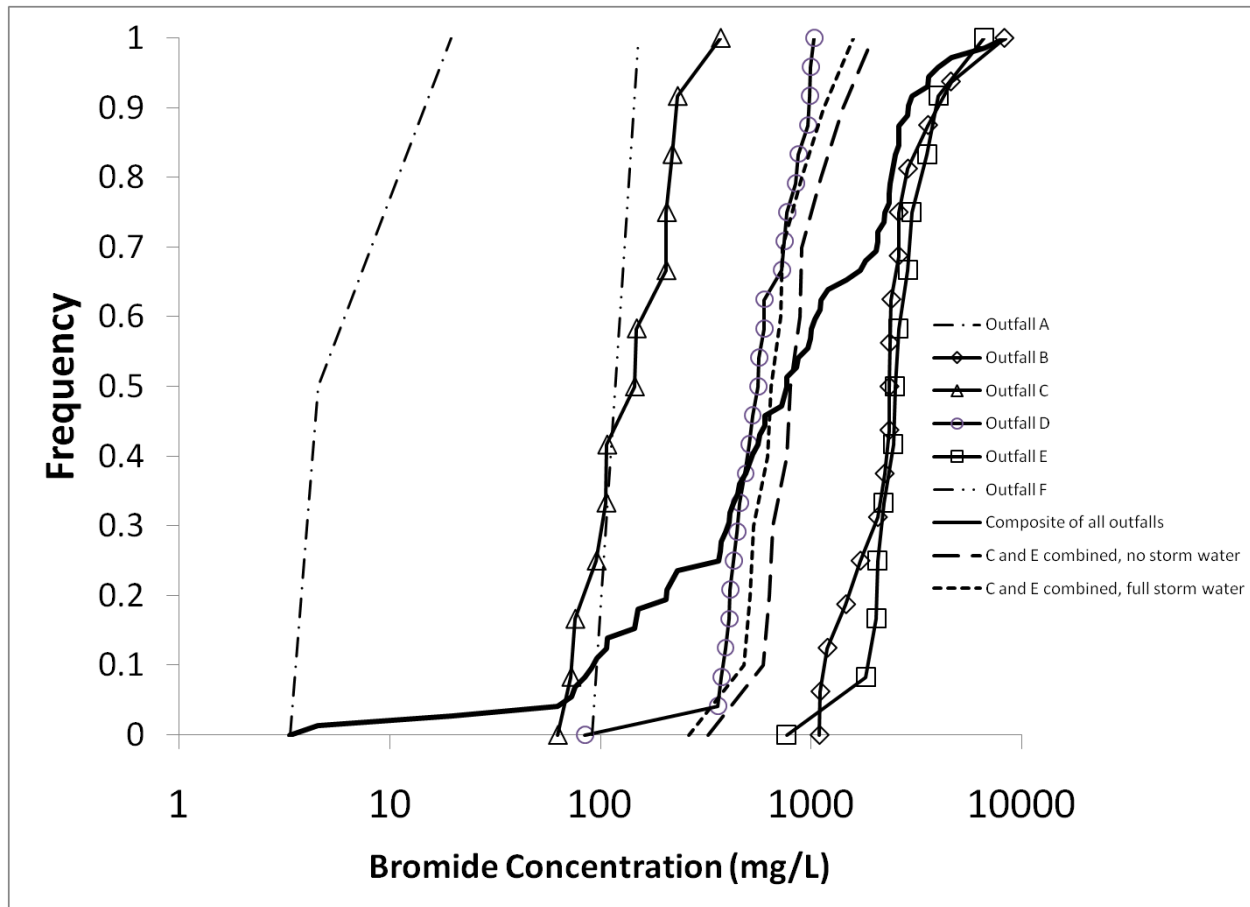

Figure S1. Frequency of bromide from outfalls with NPDES-reported data with non-Marcellus shale data collected after 9/2011 included. The composite frequency distribution from all plants is shown as a solid line without symbols. Outfalls A (dot-dash) and F (dot-dot-dash) had limited data on plant operation and were not used in scenarios. Outfalls C (triangles) and outfall E (squares) discharged treated flowback and produced water, respectively. These two were monitored separately but were combined at the point of discharge, with either no storm water (short dash) or with a design maximum of 59.1 m<sup>3</sup>/s (long dash). Outfall D (circles) discharged similar concentrations to the combined flowback and produced water of C & E. Outfall B (diamonds) discharged similarly to the treated produced water from outfall E.

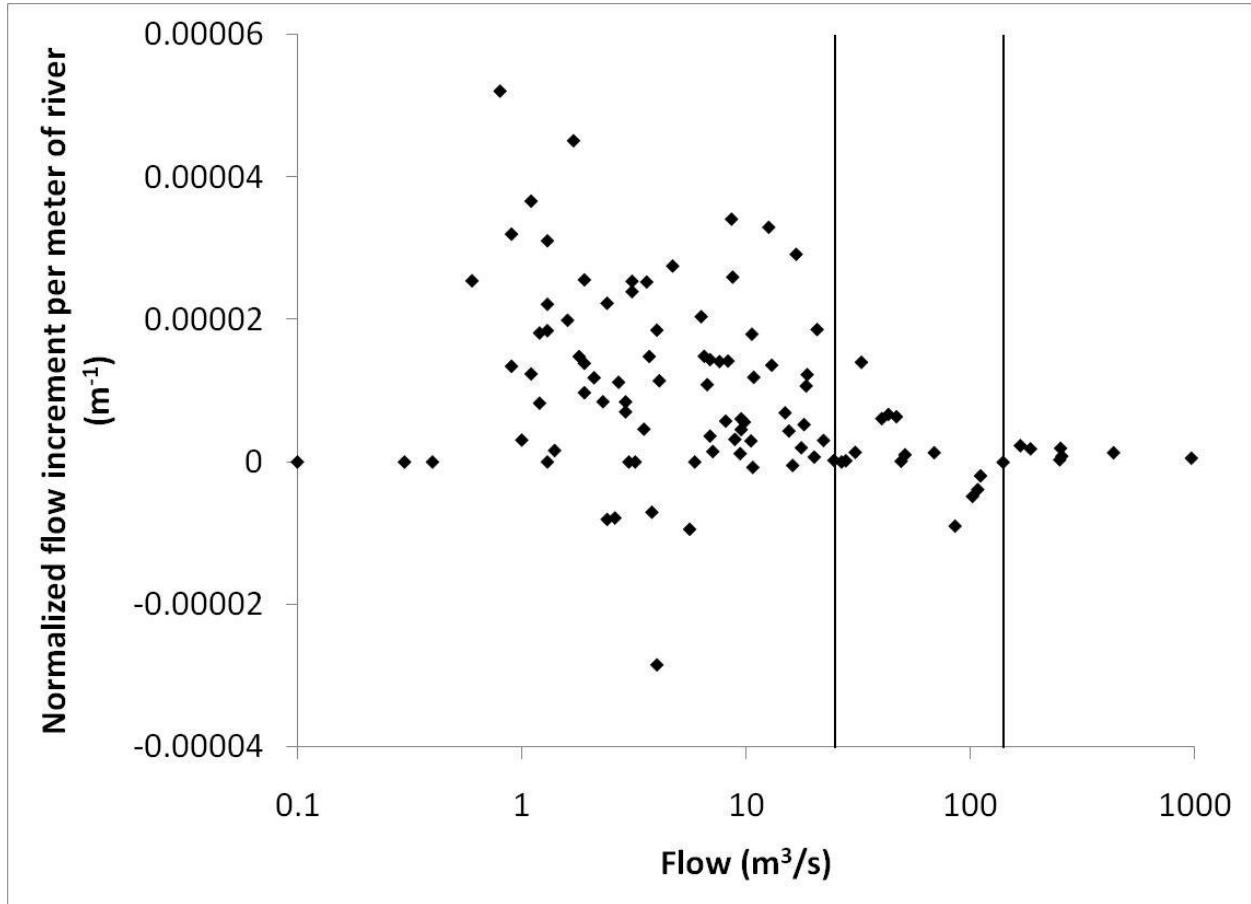

Figure S2. Normalized flow increment per meter of river as a function of flow rate. Approximate break points for Monte Carlo simulation increments are indicated for flows of 25 m<sup>3</sup>/s and 140 m<sup>3</sup>/s.

## SUPPLEMENTAL DATA

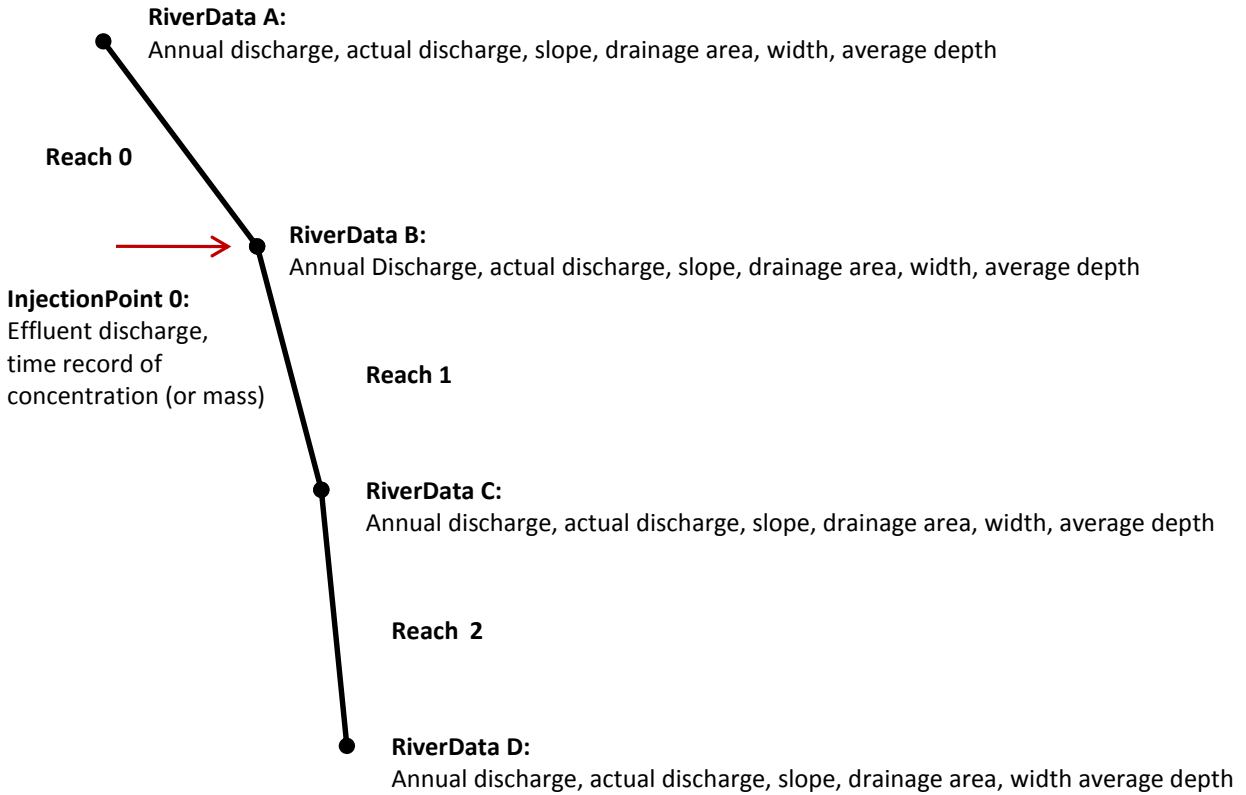

Figure S3. Data relationships in the empirical and numerical models. River reaches are constructed from contributing upstream and downstream reaches. River properties are contained in RiverData objects, which are assigned to upstream and downstream ends of reaches. Injection points are always located at the downstream end of a reach.

SUPPLEMENTAL DATA

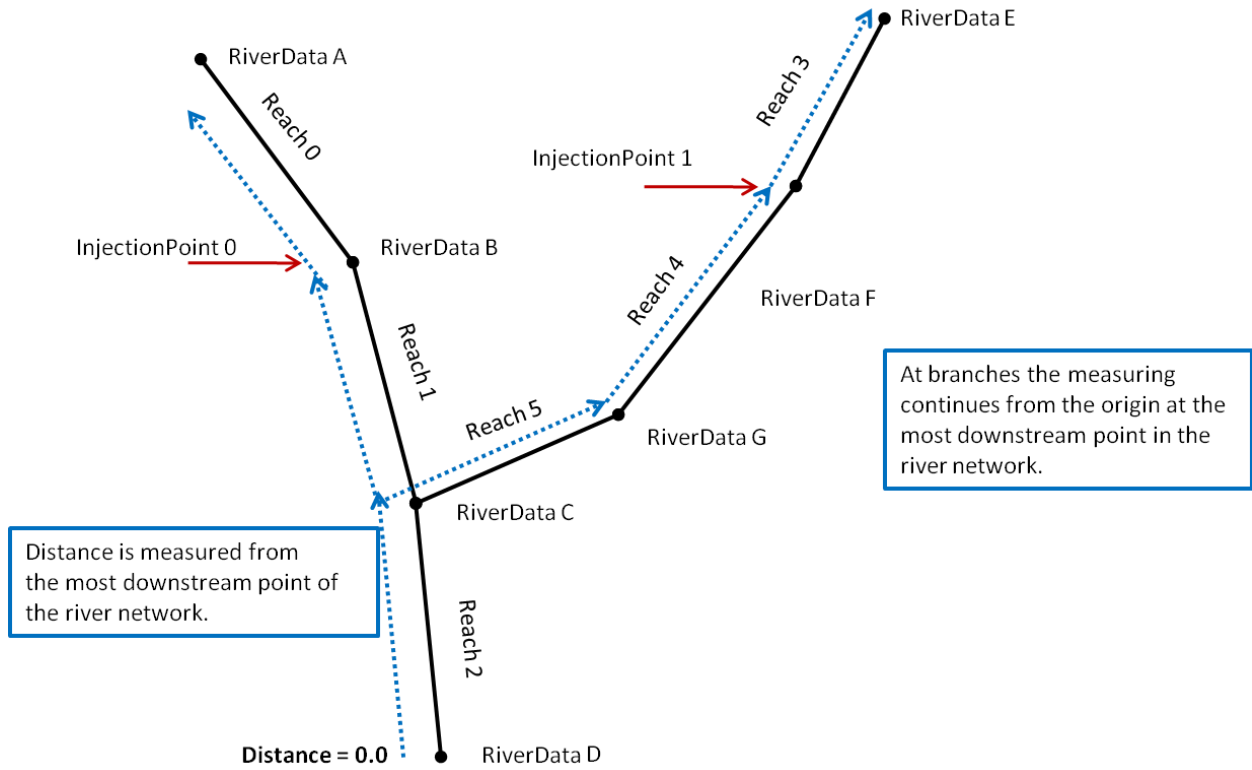

Figure S4. All distances in the models are measured from the most downstream point in the network. Measurement of distance along branches continues using the most downstream point of the entire network as the origin.



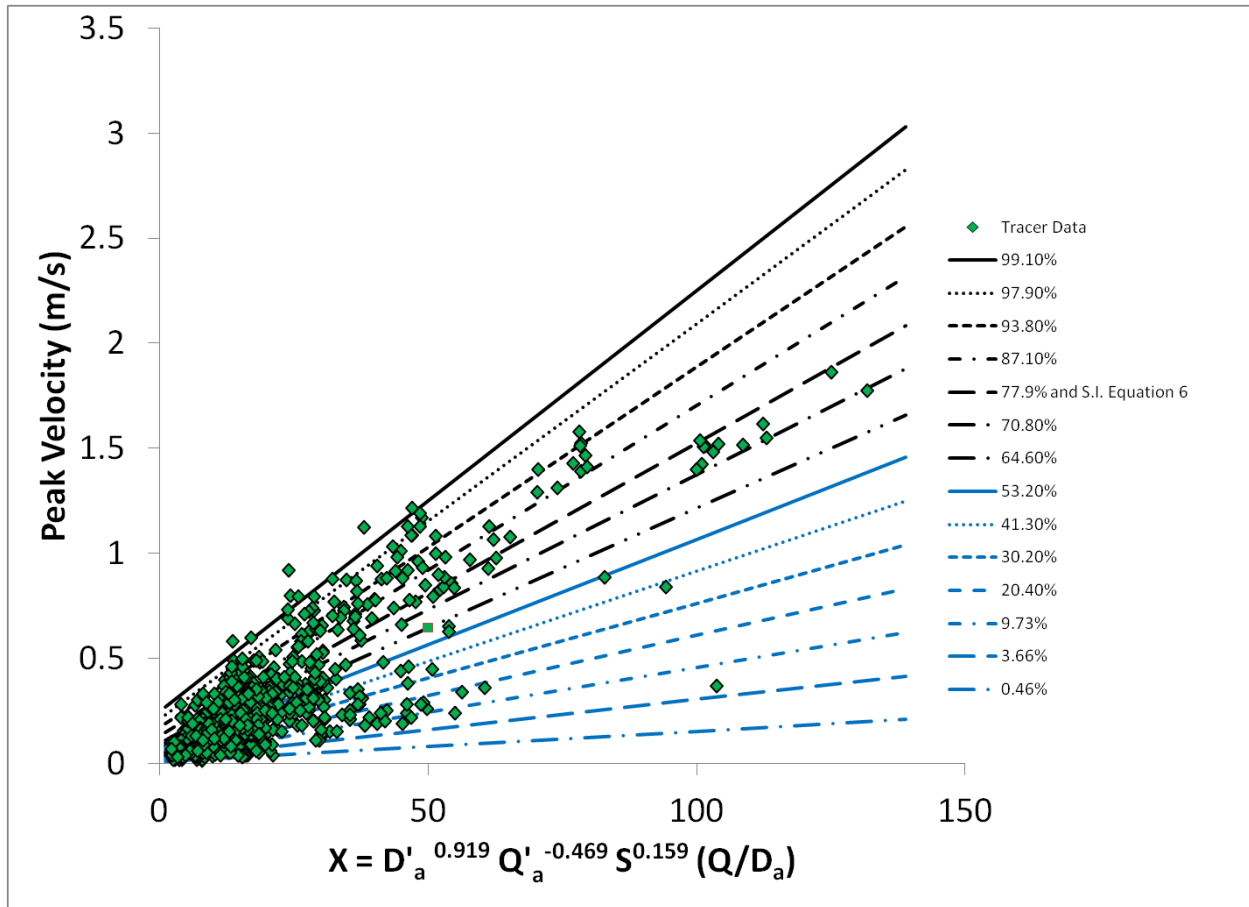

Figure S5. Peak velocity from Jobson (1996) data analysis. The lines drawn on the figure indicate Jobson's bounding (Jobson equation 13) and best fit (equation 12) regression lines, along with a set of regression lines constructed to provide a cumulative frequency distribution. The percentages give the cumulative percent of the data points lying below the line.

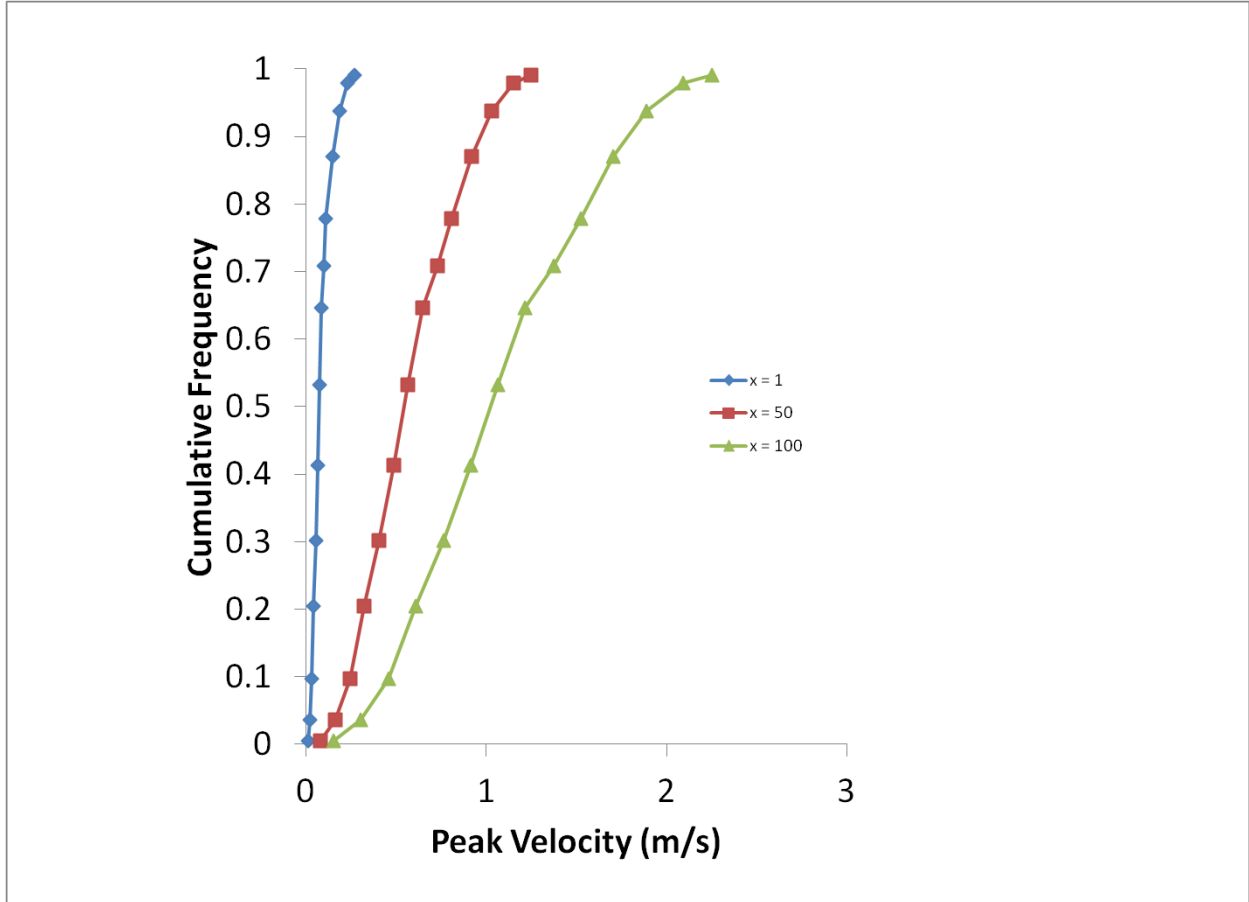

Figure S6. Cumulative frequency curves for peak velocity as parameterized by the quantity  $x$ , which is equal to  $D_a^{0.919} Q_a^{-0.469} S^{0.159} \frac{Q}{D_a}$ .

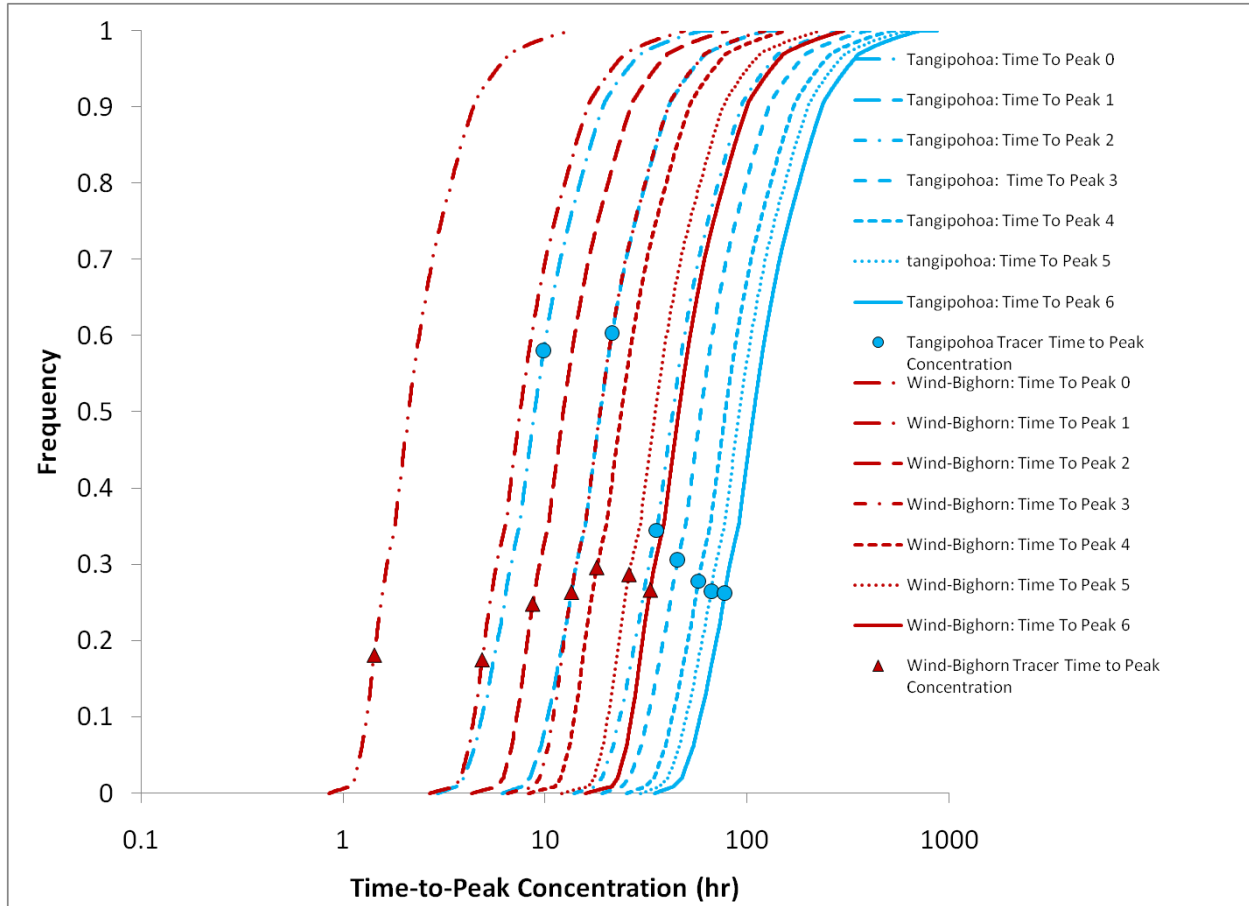

Figure S7. Peak arrival times for tracer experiments in the Tangipohoa River (circles) and the Wind-Bighorn River (triangles), plotted against the frequency distributions from the model.

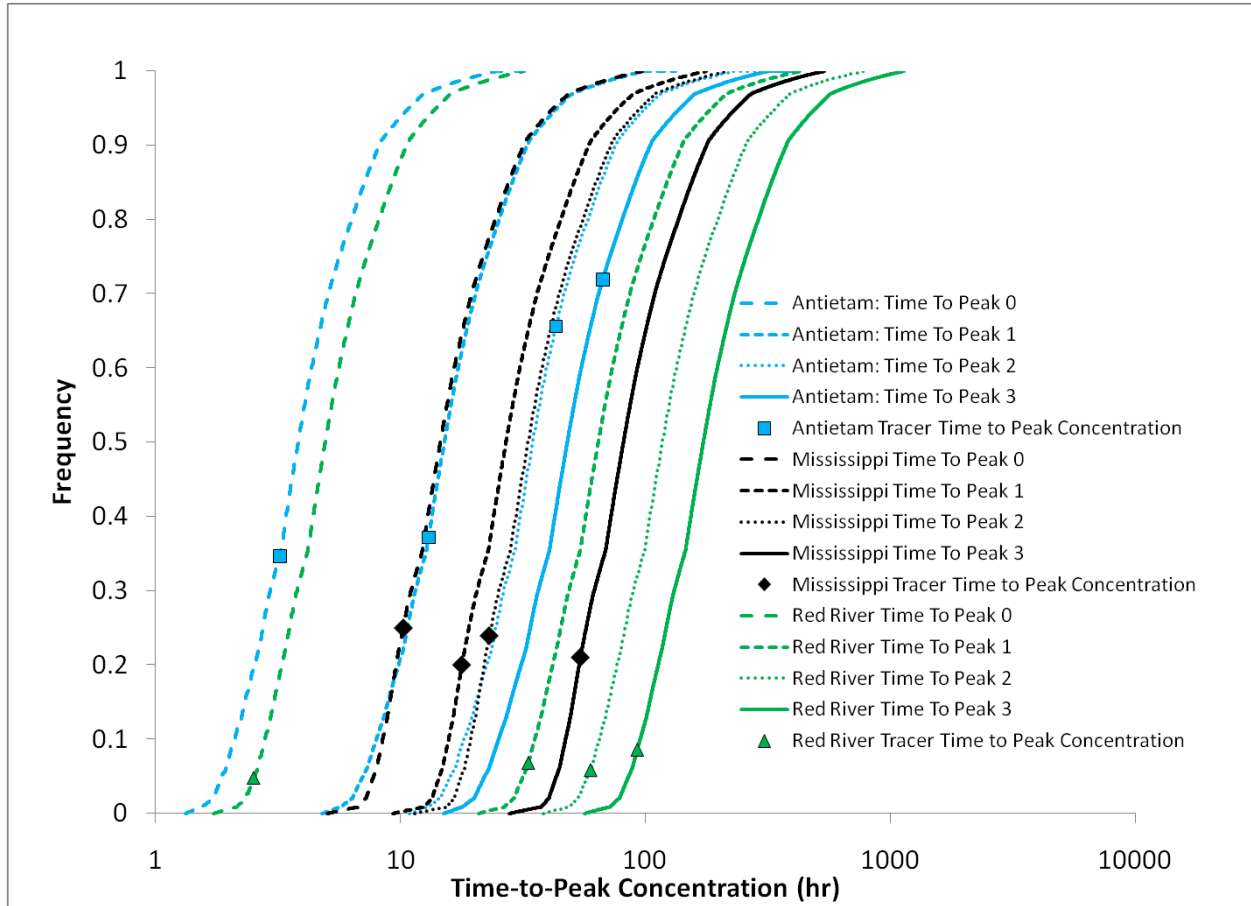

Figure S8. Peak arrival times for tracer experiments in Antietam Creek (squares), the Red River (triangles), and the Mississippi River (diamonds), plotted against the frequency distributions from the model.

SUPPLEMENTAL DATA

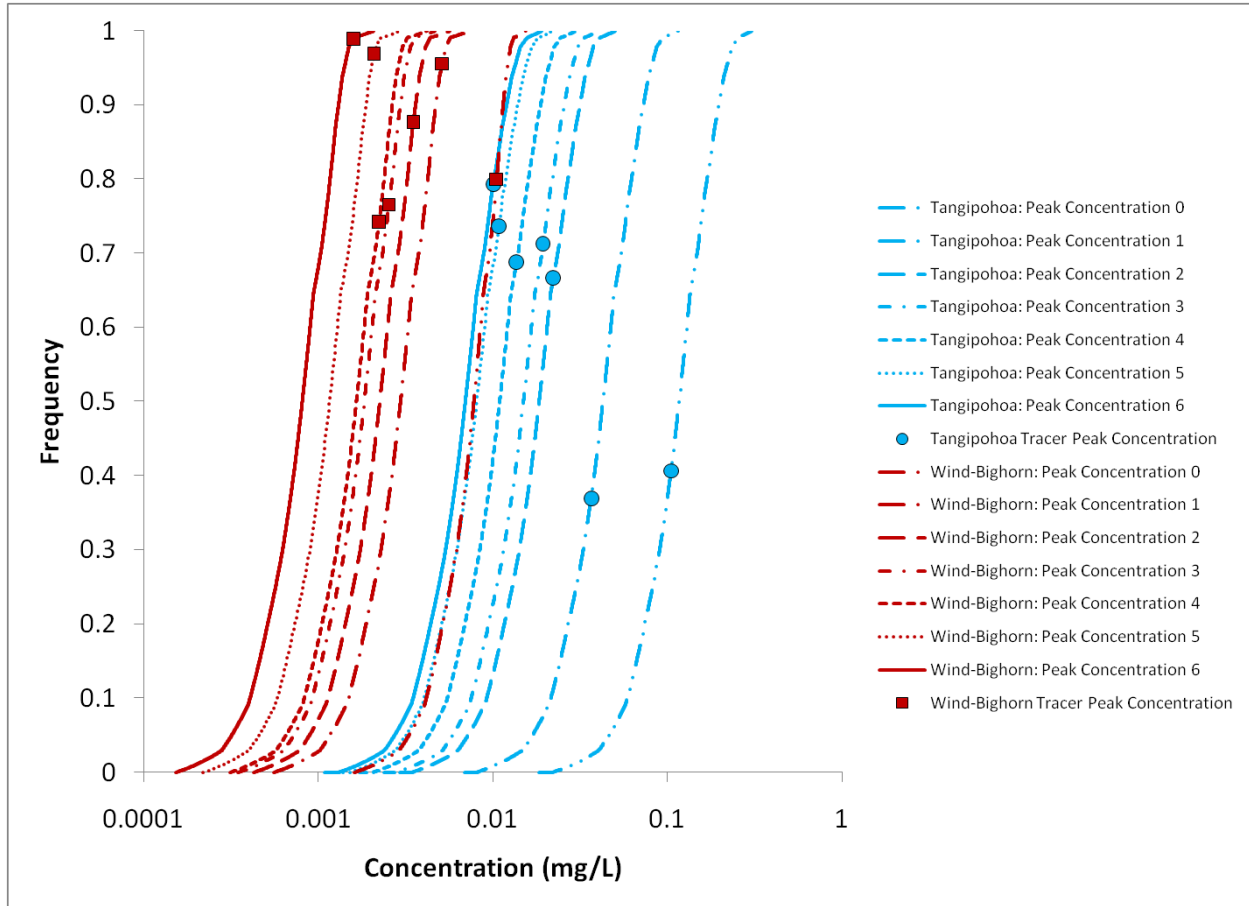

Figure S9. Peak concentrations for tracer experiments in the Tangipohoa River (circles) and the Wind-Bighorn River (triangles), plotted against the frequency distributions from the model.

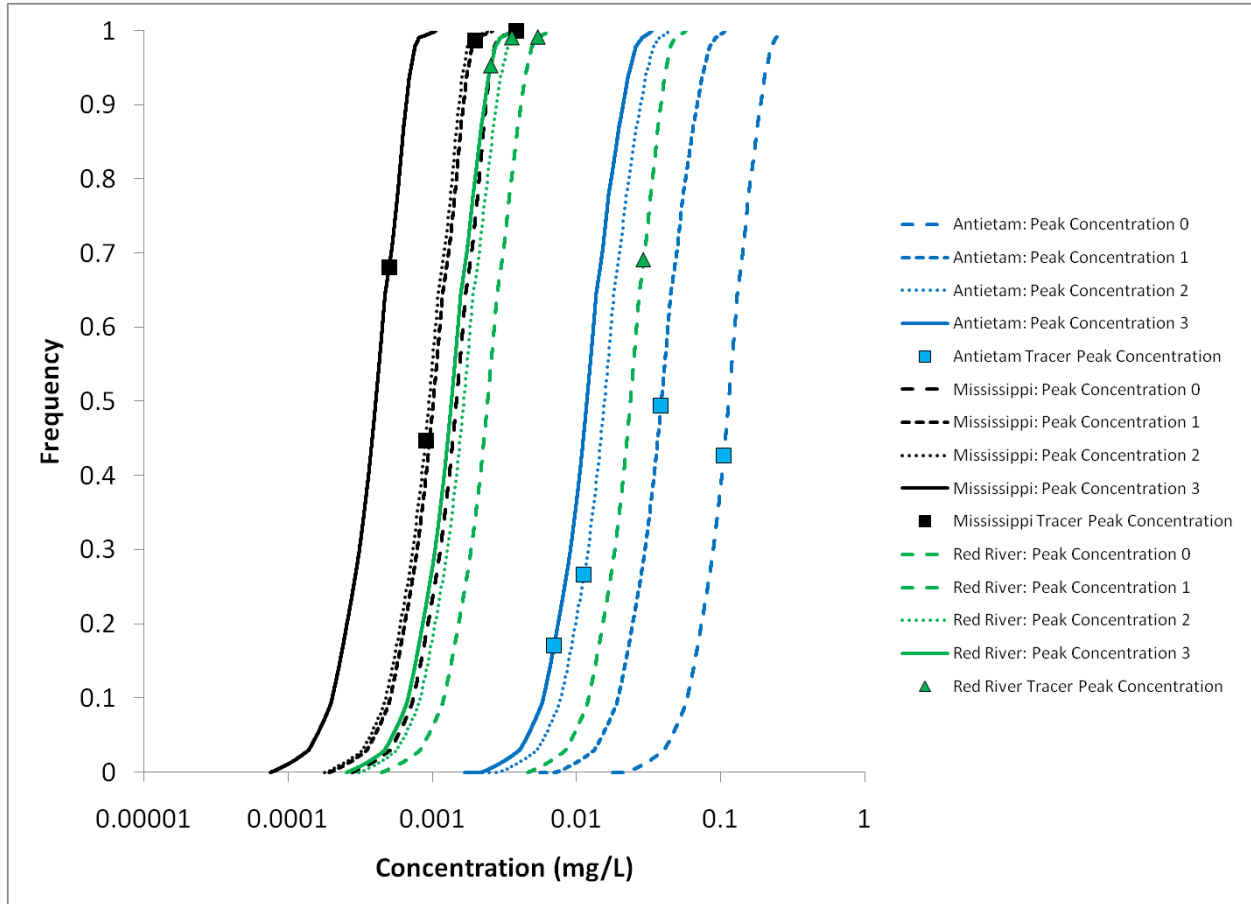

Figure S10. Peak concentrations for tracer experiments in Antietam Creek (squares), the Red River (triangles), and the Mississippi River (squares), plotted against the frequency distributions from the model.

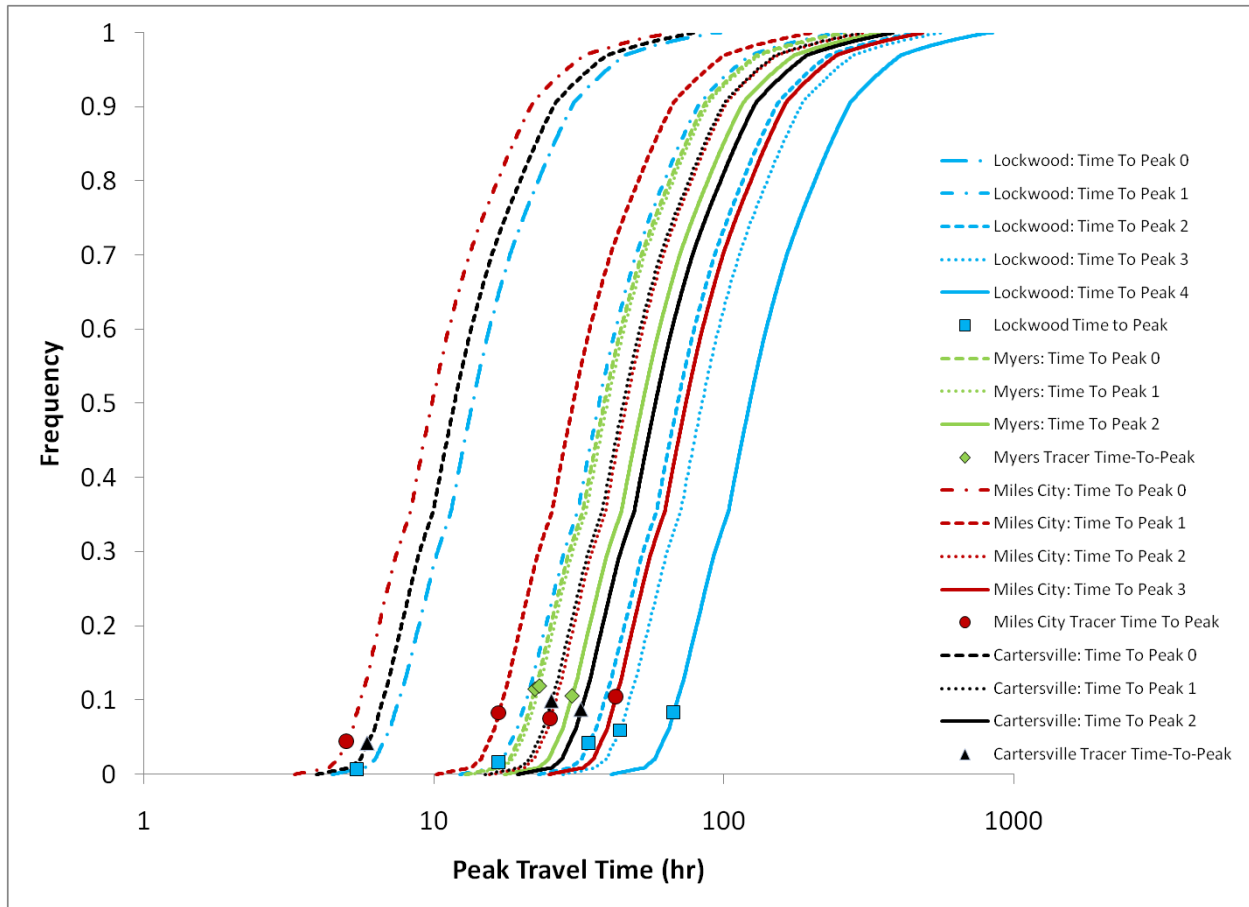

Figure S11. Yellowstone River tracer time-to-peak plotted against the model frequency distribution for releases at Lockwood Bridge (squares), Myers Bridge (diamonds), Miles City Bridge(circles), and Cartersville Dam (triangles).

**SUPPLEMENTAL DATA**

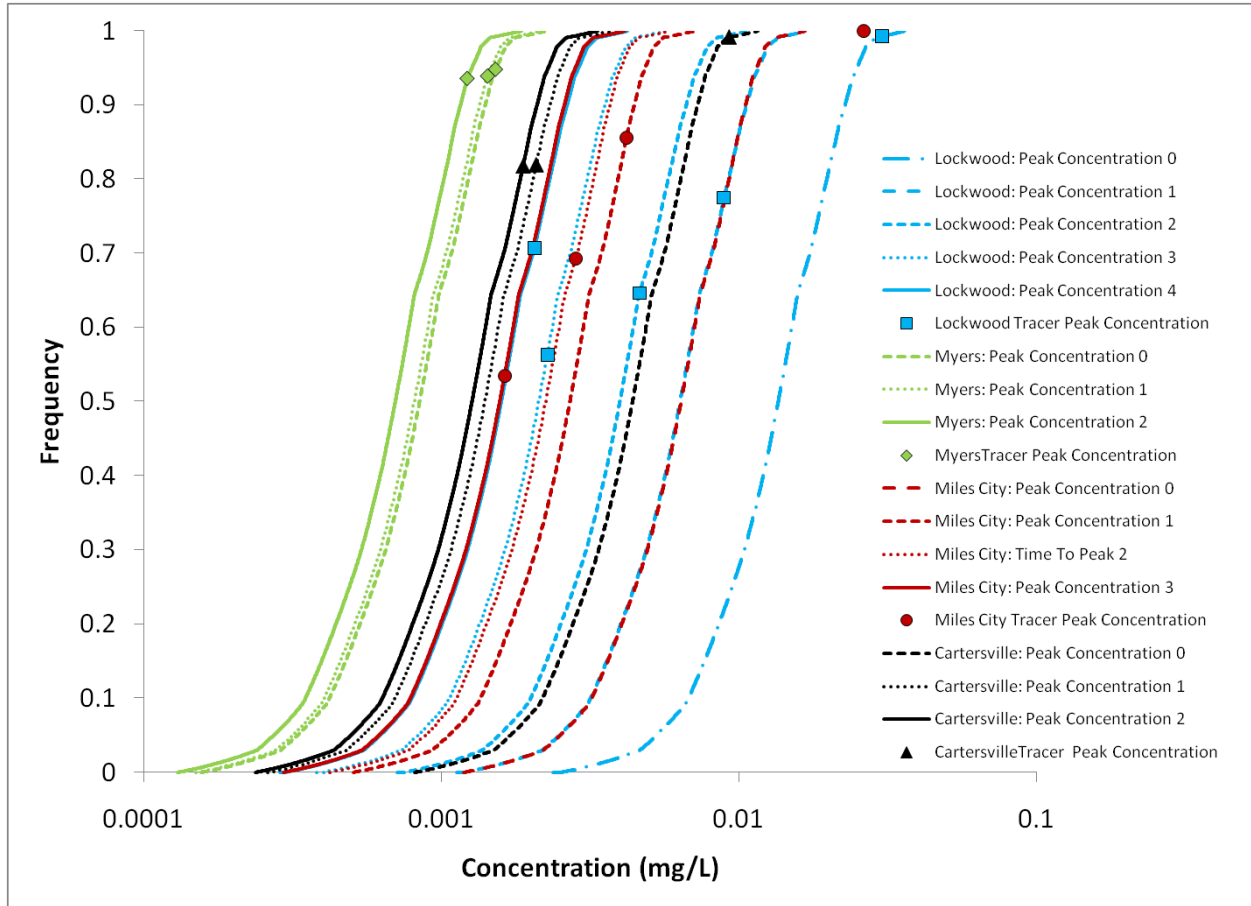

Figure S12. Yellowstone River tracer peak concentrations plotted against the model frequency distribution for releases at Lockwood Bridge (squares), Myers Bridge (diamonds), Miles City Bridge(circles), and Cartersville Dam (triangles).
